# Supplementary material
Source: ML conference proceedings conference paper supplement (https://openaccess.thecvf.com/content/cvpr_2017/html/Xie_All_You_Need_2017_CVPR_paper.html)
Supplement: Supplementary file 1 [file Xie_All_You_Need_2017_CVPR_supplemental.pdf]

# All You Need is Beyond a Good Init: Exploring Better Solution for Training Extremely Deep Convolutional Neural Networks with Orthonormality and Modulation

Di Xie

xiedi@hikvision.com

Jiang Xiong

xiongjiang@hikvision.com

Shiliang Pu

pushiliang@hikvision.com

Hikvision Research Institute  
Hangzhou, China

## 1. Quasi-isometry inference with Batch Normalization

For batch normalization (BN) layer, its Jacobian, denoted as  $\mathbf{J}$ , is not only related with components of activations ( $d$  components in total), but also with samples in one mini-batch (size of  $m$ ).

Let  $x_j^{(k)}$  and  $y_i^{(k)}$  be  $k$ th component of  $j$ th input sample and  $i$ th output sample respectively and given the independence between different components,  $\frac{\partial y_i^{(k)}}{\partial x_j^{(k)}}$  is one of  $m^2 d$  nonzero entries of  $\mathbf{J}$ . In fact,  $\mathbf{J}$  is a tensor but we can express it as a blocked matrix:

$$\mathbf{J} = \begin{bmatrix} \mathbf{D}_{11} & \mathbf{D}_{12} & \cdots & \mathbf{D}_{1m} \\ \mathbf{D}_{21} & \mathbf{D}_{22} & \cdots & \mathbf{D}_{2m} \\ \vdots & \vdots & \ddots & \vdots \\ \mathbf{D}_{m1} & \mathbf{D}_{m2} & \cdots & \mathbf{D}_{mm} \end{bmatrix} \quad (1)$$

where each  $\mathbf{D}_{ij}$  is a  $d \times d$  diagonal matrix:

$$\mathbf{D}_{ij} = \begin{bmatrix} \frac{\partial y_i^{(1)}}{\partial x_j^{(1)}} & & & & & \\ & \frac{\partial y_i^{(2)}}{\partial x_j^{(2)}} & & & & \\ & & \ddots & & & \\ & & & \ddots & & \\ & & & & \frac{\partial y_i^{(d)}}{\partial x_j^{(d)}} & \end{bmatrix} \quad (2)$$

Since BN is a component-wise rather than sample-wise transformation, we prefer to analyse a variant of Eq. 1 instead of  $\mathbf{D}_{ij}$ . Note that by elementary matrix transformation, the  $m^2 d \times d$  matrices can be converted into  $d m \times m$  matrices:

$$\mathbf{J} = \begin{bmatrix} \mathbf{J}_{11} & \mathbf{0} & \cdots & \mathbf{0} \\ \mathbf{0} & \mathbf{J}_{22} & \cdots & \mathbf{0} \\ \vdots & \vdots & \ddots & \vdots \\ \mathbf{0} & \mathbf{0} & \cdots & \mathbf{J}_{dd} \end{bmatrix} \quad (3)$$

and the entries of each  $\mathbf{J}_{kk}$  is

$$\frac{\partial y_j}{\partial x_i} = \rho \left[ \Delta(i=j) - \frac{1 + \hat{x}_i \hat{x}_j}{m} \right] \quad (4)$$

The notations of  $\rho$ ,  $\Delta(\cdot)$  and  $\hat{x}_k$  have been explained in our main paper and here we omit the component index  $k$  for clarity. Base on the observation of Eq. 4, we separate the numerator of latter part and denote it as  $U_{ij} = 1 + \hat{x}_i \hat{x}_j$ .

Let  $\hat{\mathbf{x}} = (\hat{x}_1, \hat{x}_2, \dots, \hat{x}_m)^T$ ,  $\mathbf{e} = (1, 1, \dots, 1)^T$ , we have

$$\mathbf{U} = \mathbf{e}\mathbf{e}^T + \hat{\mathbf{x}}\hat{\mathbf{x}}^T \quad (5)$$

and

$$\mathbf{J}_{kk} = \rho(\mathbf{I} - \frac{1}{m}\mathbf{U}) \quad (6)$$

Recall that for any column vector  $\mathbf{v}$ ,  $\text{rank}(\mathbf{v}\mathbf{v}^T) = 1$ . According to the subadditivity of matrix rank [1], it implies that

$$\begin{aligned} \text{rank}(\mathbf{U}) &= \text{rank}(\mathbf{e}\mathbf{e}^T + \hat{\mathbf{x}}\hat{\mathbf{x}}^T) \leq \\ &\text{rank}(\mathbf{e}\mathbf{e}^T) + \text{rank}(\hat{\mathbf{x}}\hat{\mathbf{x}}^T) = 2 \end{aligned} \quad (7)$$

Eq. 7 tells us that  $\mathbf{U}$  actually only has two nonzero eigenvalues, say  $\lambda_1$  and  $\lambda_2$ , and we can formulate  $\mathbf{U}$  as follow:

$$\mathbf{U} = \mathbf{P}^T \begin{bmatrix} \lambda_1 & & & & \\ & \lambda_2 & & & \\ & & 0 & & \\ & & & \ddots & \\ & & & & 0 \end{bmatrix} \mathbf{P} \quad (8)$$

combined with Eq. 6, finally we get the equation of  $\mathbf{J}_{kk}$  from the eigenvalue decomposition view, which is

$$\mathbf{J} = \mathbf{P}^T \rho \begin{bmatrix} 1 - \frac{\lambda_1}{m} & & & & \\ & 1 - \frac{\lambda_2}{m} & & & \\ & & 1 & & \\ & & & \ddots & \\ & & & & 1 \end{bmatrix} \mathbf{P} \quad (9)$$

To show that  $\mathbf{J}_{kk}$  probably is not full rank, we formulate the relationship between  $\mathbf{U}^2$  and  $\mathbf{U}$

$$\begin{aligned}
\mathbf{U}^2 &= (\mathbf{e}\mathbf{e}^T + \hat{\mathbf{x}}\hat{\mathbf{x}}^T)(\mathbf{e}\mathbf{e}^T + \hat{\mathbf{x}}\hat{\mathbf{x}}^T) = \mathbf{e}\mathbf{e}^T\mathbf{e}\mathbf{e}^T + \mathbf{e}\mathbf{e}^T\hat{\mathbf{x}}\hat{\mathbf{x}}^T \\
&\quad + \hat{\mathbf{x}}\hat{\mathbf{x}}^T\mathbf{e}\mathbf{e}^T + \hat{\mathbf{x}}\hat{\mathbf{x}}^T\hat{\mathbf{x}}\hat{\mathbf{x}}^T = m\mathbf{e}\mathbf{e}^T + \left(\sum_{i=1}^m \hat{x}_i\right)\mathbf{e}\hat{\mathbf{x}}^T \\
&\quad\quad\quad + \left(\sum_{i=1}^m \hat{x}_i\right)\hat{\mathbf{x}}\mathbf{e}^T + \left(\sum_{i=1}^m \hat{x}_i^2\right)\hat{\mathbf{x}}\hat{\mathbf{x}}^T \\
&= m\mathbf{U} + \left(\sum_{i=1}^m \hat{x}_i\right)\mathbf{e}\hat{\mathbf{x}}^T + \left(\sum_{i=1}^m \hat{x}_i\right)\hat{\mathbf{x}}\mathbf{e}^T + \left(\sum_{i=1}^m \hat{x}_i^2 - m\right)\hat{\mathbf{x}}\hat{\mathbf{x}}^T
\end{aligned} \tag{10}$$

Note that  $\hat{x}_i \sim N(0, 1)$ , so we can regard the one-order and second-order accumulated items in Eq. 10 as approximately equaling the corresponding one-order and second-order statistical moments for relatively large mini-batch, from which we get  $\mathbf{U}^2 \approx m\mathbf{U}$ .

The relationship implies that  $\lambda_1^2 \approx m\lambda_1$  and  $\lambda_2^2 \approx m\lambda_2$ . Since  $\lambda_1$  and  $\lambda_2$  cannot be zeros, it concludes that  $\lambda_1 \approx \lambda_2 \approx m$  therefore  $1 - \frac{\lambda_1}{m} \approx 0$  and  $1 - \frac{\lambda_2}{m} \approx 0$  if batch size is sufficient in a statistical sense.

## References

- [1] S. Banerjee and A. Roy. Linear algebra and matrix analysis for statistics. *Crc Press*, 2014.
